# Supplementary material for: Absolute quantitative measurement of transcriptional kinetic parameters in vivo
Source: PubMed Central journal article supplement — Nucleic Acids Res. 2016 Jul 4;44(18):e142. doi: 10.1093/nar/gkw596 (PMC5062976; doi:10.1093/nar/gkw596), 2016-07-04
Supplement: supp_gkw596_nar-01066-met-g-2016-File003.pdf [file supp_gkw596_nar-01066-met-g-2016-File003.pdf]

## Supplementary Material

Absolute quantitative measurement of transcriptional kinetic parameters *in vivo*

S. Iyer, B. Park and M. Kim

|                              |    |
|------------------------------|----|
| Supplementary Methods.....   | 2  |
| Supplementary Note.....      | 4  |
| Supplementary Figure.....    | 7  |
| Supplementary Table.....     | 13 |
| Supplementary Reference..... | 17 |

## Supplementary Methods

### Construction of a new chromosomal *lacZ* reporter strain.

We used a plasmid, pKDT\_P<sub>Ltet-O1</sub>-cat as a template (1). The cassette “*Km<sup>r</sup>:rrnBT:P<sub>Llac-O1</sub>-cat*” from this plasmid was amplified using the forward primer “Lac\_integration\_for” (GCATTTACGTTGACACCATCGAATGGCGCAAAACCTTTTCGCGGTATGTGTAGGCTGGAGCTGCTTC) and reverse primer “rbs1\_ptet\_lacZ\_integration\_rev” (CGTTGTAAAACGACGGCCAGTGAATCCGTAATCATGGTCATGGTACCTTTCTCCTCTTTAATGAATTCGGTCAGT). The forward primer was designed to contain 47 bases from the *lacI* promoter region followed by a 19 base region that hybridizes to the pKDT plasmid upstream of the kanamycin cassette. The reverse primer was designed to contain three components, the first 22 bases of the primer corresponding to the 5'UTR region of the *cat* gene in the pKDT plasmid, a synthetic ribosome binding site (RBS) sequence, and the first 35 bases of the *lacZ* coding region to facilitate integration of the construct into the chromosome. Hence, the PCR products amplified from the primers contain the region containing -14 to -61 bases relative to transcription start site of *lacI* gene, kanamycin resistance gene, *rrnB* terminator, P<sub>Ltet-O1</sub> promoter, 5'UTR, the synthetic RBS, and first 35 bases of the *lacZ* coding region. The PCR products were purified and transferred to NCM3722 that expresses TetR from a constitutive promoter (P<sub>con-tetR</sub>)(2). The result strain was named NMK80.

### Fluorescence *in situ* hybridization

We followed the procedure described in ref (3).

- Labeling the probes

1. Probe Design. DNA oligonucleotide probes were designed using the software available on the Biosearch technologies website (See Supplementary Table for the sequences used). The oligonucleotides with 3' amine modifications (to facilitate labeling of the probes with fluorescent dyes with NHS ester modification) were ordered from the same company. The length of each probe was 20 nucleotides long. Approximately, 20 to 25 probes are chosen for each section of mRNA molecules (i.e., head, body and tail).

2. Probe labeling. To label the probes with fluorescent dyes, ATTO 647N (Sigma #18373), ATTO 488 (Sigma #41698), and 6-TAMRA (ThermoFischer #C6123), equal volumes of 100 μM oligo solutions were combined to a final volume of 720 μl. For example, to label probes used for the head of the *lacZ* mRNA molecules, we took 28.8 μl of each of the 25 oligo solutions to give a final volume of 720 μl. To the solution, 40 μl of 1 M sodium bicarbonate solution was added (Solution 1). In another tube, 1 mg of the fluorescent dye was dissolved in 2 μl of dimethyl sulfoxide (Fisher Scientific, #BP231), and 25 μl of 0.1 M sodium bicarbonate solution was added to the solution (Solution 2). Then, the Solution 1 and Solution 2 were mixed and incubated overnight at 37 °C in the dark.

3. Washing. 787 μl of the combined solution was transferred to 2 ml eppendorf tube, and 47 μl of 3 M sodium acetate solution (pH 5.2, autoclaved) (Fisher Scientific, #BP333) was added. Then, 1180 μl of 100% ethanol was added. The solution was incubated at -70 °C for at least 3 hours (up to overnight). Then, it was centrifuged in a bench-top microcentrifuge at 13000 g for 30 minutes. The supernatant was discarded and any remaining liquid was removed with Kimwipes. The pellet was dissolved in 45 μl of water. To this, 5 μl of 3 M sodium acetate solution (pH 5.2) and 125 μl of ethanol was added, mixed

thoroughly and placed at  $-80\text{ }^{\circ}\text{C}$  for at least 3 hrs. This washing procedure was repeated two times more to remove free dyes. Finally,  $500\text{ }\mu\text{l}$  1X Tris-EDTA (pH 8.0) (Fisher Scientific, #BP2473) was added to the pellet of probes to yield the probe concentration of  $3\text{ }\mu\text{M}$  (the concentration was measured using a spectrophotometer). Below, we will call this solution the probe stock solution. Then, the tube was wrapped in aluminum foil and stored at  $-20\text{ }^{\circ}\text{C}$ .

- Sample collection

$300\text{ }\mu\text{l}$  of 37% formaldehyde was added to 15 ml conical tubes prior to sample collection. At the times indicated, 2.7 ml of cultures was added to the tubes. After 30 minutes of incubation at room temperature, cells were spun down at 1000 g for 8 minutes. The supernatant is removed and the pellet was resuspended in 1 ml of PBS buffer (ThermoFischer, # AM9625) and transferred to 1.5 ml eppendorf tubes. The cells were spun down 900 g for 8 minutes. The cells were washed again using the PBS buffer. Following the second wash, cells were resuspended in  $300\text{ }\mu\text{l}$  of water and  $700\text{ }\mu\text{l}$  of 100% ethanol. Cells were incubated at room temperature at least for 1hr or overnight at  $4^{\circ}\text{C}$ .

- Hybridizing mRNAs with probes

Cells were spun down at 800 g for 8 minutes and resuspended in 1 ml of 40% wash buffer (2X SSC buffer and 40% w/v formamide). Then, cells were spun down at 1000 g for 7 minutes and resuspended in the  $50\text{ }\mu\text{l}$  hybridization buffer; 10 ml of hybridization buffer contains 1 g of dextran sulfate (Sigma, #D8906),  $3530\text{ }\mu\text{l}$  of formamide, 10 mg of *E. coli* tRNA (Sigma, #R4251), 1 ml of 20X SSC,  $40\text{ }\mu\text{l}$  of 50 mg/ml BSA (Ambion, #AM2616), and  $100\text{ }\mu\text{l}$  of 200 mM ribonucleoside vanadyl complex (New England Biolabs, #S1402S). (After the preparation, the hybridization buffer was filter sterilized, aliquoted, and stored at  $-20\text{ }^{\circ}\text{C}$ .) To the  $50\text{ }\mu\text{l}$  hybridization buffer containing cells,  $2\text{ }\mu\text{l}$  of the probe stock solution was added (because the concentration of the stock solution was initially  $3\text{ }\mu\text{M}$ , the final concentration of the probes after added to the hybridization buffer is 120 nM) and the mixture was incubated at  $30\text{ }^{\circ}\text{C}$  overnight.

- Washing and preparing cells

Cells were spun down at 900 g at 8 minutes and resuspended in 1 ml of the 40% wash buffer. This procedure was repeated three times. The cells were finally resuspended in  $10\text{ }\mu\text{l}$  of 2X SSC buffer.

- Imaging

$3\text{ }\mu\text{l}$  of cell sample was placed on a coverslip  $30\times 40$ , #1.5 coverslip. An agarose pad or  $30\times 30\text{ mm}$  coverslip was placed on the top of the cells. Cells were then imaged using an inverted epi fluorescent (Olympus IX83P2Z) using a cooled cSMOS camera (Andor Neo). A  $60\times$  or  $100\times$  oil immersion phase contrast objective was used for magnification. The microscope and camera were controlled using the Metamorph software (Molecular Devices). The best focal plane for imaging (z- position) was first determined using the phase contrast image. Then, varying the z- position at spacing of 300 nm, nine fluorescence images (at different z-positions) were acquired. The exposure time for each image was 2s. The intensity of the excitation light was adjusted such that fluorescent foci are clearly visible while minimizing photobleaching. Each sample was imaged at several locations to obtain the images of at least 1000 cells.

## Supplementary Note 1

We obtained the number of *lacZ* mRNAs per cell from fluorescence images as described in Supplementary Figure S1. For the head of the mRNA, 25 probes covering the first 935 nucleotides (nt) were used. Then we determined the intensities of individual fluorescence spots. From the histogram of the intensities, we determined the fluorescence intensity of one full-length head of one *lacZ* mRNA molecule,  $I_T$ . To examine the dynamics of mRNA expression after transcriptional activation, we used the intensity to characterize the increase in the number of the head after mRNA induction (Figure 3). By fitting the region of the linear increase, we obtained  $T_{head}$ . (Performing a similar analysis, we obtained  $T_{body}$  and,  $T_{tail}$ ).

In a control experiment, we found that even with the first ~17 probes (which cover the first 605 nucleotides), a fluorescent spot from a single *lacZ* mRNA molecule was visible in the experimental set-up used. This leads to uncertainty in determining a complete, full-length head of the mRNA. To further elaborate this point, we consider that after transcription was initiated, a RNA polymerase synthesized the first 605 nucleotides. When this incomplete piece of the mRNA was hybridized using our original 25 probes, 17 probes will be hybridized to the first 605 nucleotides and emit strong enough fluorescence to be identified as a single head of a single mRNA. While we tried our best to reject any spots whose intensity is significantly less than  $I_T$ , it is possible that incomplete transcripts whose lengths are between 605 and 935 nucleotides might have been identified as a full-length head.

In this note, we will estimate an error in determination of  $T_{head}$  due to the uncertainty in identification of a full-length head. To estimate the error, we reformulate this problem in the following way. Consider  $Y_1$  nucleotide long mRNAs and its expression was activated (assume no induction lag, i.e.,  $T_{lag}=0$ ). Assume that the number of the mRNA per cells were plotted against time similarly to Figure 3 and the linear region of induction kinetics (corresponding to the dashed lines in Figure 3) of the  $Y_1$  nucleotide long mRNAs follows

$$m_1 = a \cdot \left(t - \frac{Y_1}{b}\right), \quad (1)$$

where  $m_1$ ,  $a$ , and  $b$  are the mean number of  $Y_1$  nucleotide long mRNAs per cells, transcription rate and transcription elongation speed. The X intercept, the time at which the full-length ( $Y_1$  nucleotide long) mRNAs begins to appear, is  $T_{Y_1} = \frac{Y_1}{b}$ .

Now, assume that with a probability of  $p$ , premature termination occurs, producing mRNAs whose length is  $Y_2$ . If we were able to distinguish these transcripts from the original  $Y_1$  nucleotide long transcripts and followed the induction kinetics, the linear region of induction kinetics of the  $Y_2$  nucleotide long mRNA would follow

$$m_2 = a \cdot \left(t - \frac{Y_2}{b}\right) \cdot p, \quad (2)$$

where  $m_2$  is the mean number of  $Y_2$  nucleotide long mRNAs per cell.

Now, assume we cannot distinguish them; in the measurement, a  $Y_1$  nucleotide long transcript as well as a  $Y_2$  nucleotide long transcript are counted as one mRNA. If so, the linear region of the induction kinetics would look like

$$m = a \cdot \left(t - \frac{Y_1}{b}\right) \cdot (1 - p) + a \cdot \left(t - \frac{Y_2}{b}\right) \cdot p, \quad (3)$$

or alternatively put,

$$m = a \cdot \left[ t - \frac{1}{b} \cdot ((1 - p) \cdot Y_1 + p \cdot Y_2) \right], \quad (4)$$

where  $m$  is the total mean number of transcripts per cell.

The X intercept is  $\frac{1}{b} \cdot ((1 - p) \cdot Y_1 + p \cdot Y_2)$ . This is different from  $T_{Y_1} = \frac{Y_1}{b}$  (in the case that cells only produce  $Y_1$  nucleotide long mRNAs) by  $\frac{p}{b} \cdot (Y_1 - Y_2)$ . Hence, this occasional appearance of  $Y_2$  nucleotide long mRNAs results in an error of  $p \cdot \left(1 - \frac{Y_2}{Y_1}\right)$ .

Now, we apply this formula to estimate the error in our situation. In our situation,  $\frac{Y_2}{Y_1} \approx \frac{605}{935}$  and  $p$  is approximately the probability of finding transcribing RNA polymerase between 605 and 935 nucleotide, which is  $\approx \frac{(935 - 605)}{935} \cdot 100\%$ . Hence the error is estimated to be about 12%. It means the actual value of  $T_{head}$  may differ by 12% from what we obtained in the main text.

## Supplementary Note 2

For transcription, the recruitment of RNA polymerases (RNAPs) to a promoter is generally assumed to be the rate-limiting step (4,5), i.e., once RNAPs are recruited and initiate transcription, elongation proceeds smoothly. Define  $\Delta t$  as the time it take for RNAPs to complete synthesis of the tail segment of a mRNA molecule after completion of the synthesis of the head segment. Without premature termination, all RNAPs completing the synthesis of the head at  $t$  will complete the synthesis of the tail at  $t + \Delta t$ . Hence, the transcription rate of the head,  $\alpha_{head}(t)$ , is the same as the transcription rate of the tail after  $\Delta t$ , i.e.,  $\alpha_{head}(t) = \alpha_{tail}(t + \Delta t)$ . For example, in Fig. 3A, we see that the slope of the head is the same as the slope of the tail after 44 sec ( $= T_{tail} - T_{head}$ ), indicating all RNAPs completing the synthesis of the head also complete the synthesis of tail (no premature termination).

If RNAPs dissociate before completing the tail segment,  $\alpha_{head}(t) > \alpha_{tail}(t + \Delta t)$ . The difference  $\alpha_{head}(t) - \alpha_{tail}(t + \Delta t)$  will yield the rate of the RNAP dissociation rate, or alternatively put, the premature termination rate. As an example, we use the transcriptional kinetics shown in Supplementary Figure S2B. The slope of the head and tail is 1.8 /min and 1.3 /min (see the Table). From the difference of the slopes, we obtain that the rate of premature termination is 0.5 /min.

In cases of mutants with slow elongation (e.g., due to frequent RNAP pausing (6)), it is possible that transcription elongation, not initiation, may be the rate-limiting step. Such a scenario is realized if  $\Delta t$  becomes long and transcription initiation is frequent. Then, RNAPs will queue, leading to slow-moving

‘traffic jams’ of RNAPs (6). Upon transcription induction, until the traffic jams are established, the rate of transcription will be position-dependent. However, after the traffic jams are established, the dynamics of transcription becomes steady. Then, without premature termination, the transcription rate of the head will be the same as the transcription rate of the tail after  $\Delta t$ . With premature termination, the rates will be different and the rate of premature termination can be obtained from the difference.

Supplementary Figure S1

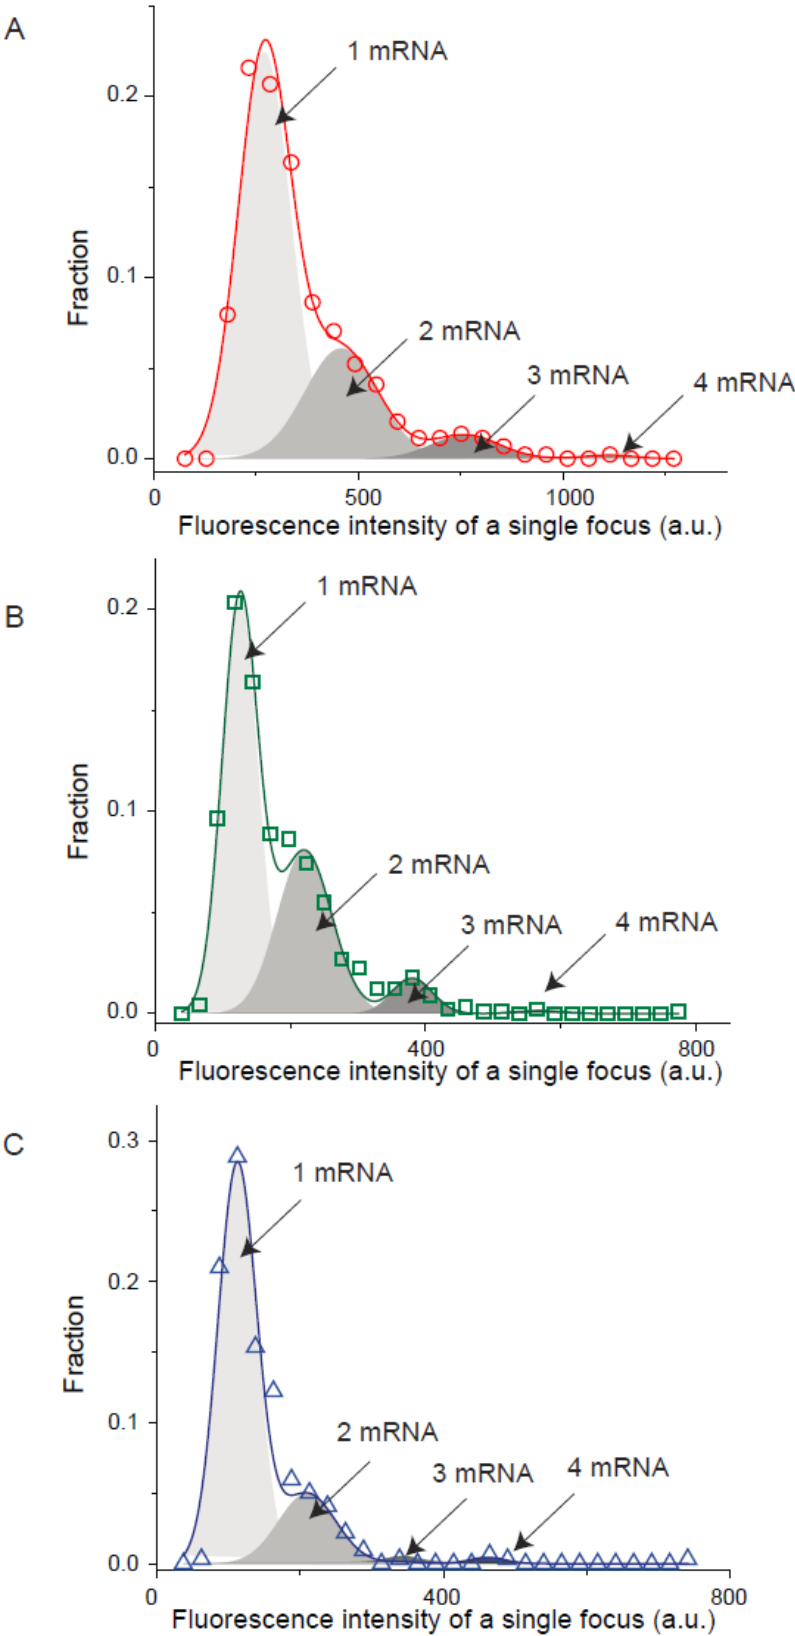

Caption: We induced the expression of *lacZ* mRNAs at very low levels and collected the samples after the expression reached the steady state. As described in the main text, mRNAs were visualized as distinct fluorescence foci. Each focus may represent more than 1 mRNA molecule, which becomes evident when we quantified the intensities of the individual fluorescence foci and drew the histogram for the head (A), body (B), and tail (C). In each histogram, we observed distinct peaks, corresponding to 1 mRNA molecule, 2 mRNA molecules, 3 mRNA molecules, and 4 mRNA molecules. Denoting the value at the center of the first peak as  $I_T$ , the centers of subsequent peaks were located approximately at  $2 \times I_T$ ,  $3 \times I_T$ , and,  $4 \times I_T$ . In other samples, the value  $I_T$  was used to convert the intensities of fluorescence foci to the total copy number of mRNA molecules at the foci. Please see (3) for the details.



Supplementary Figure S2

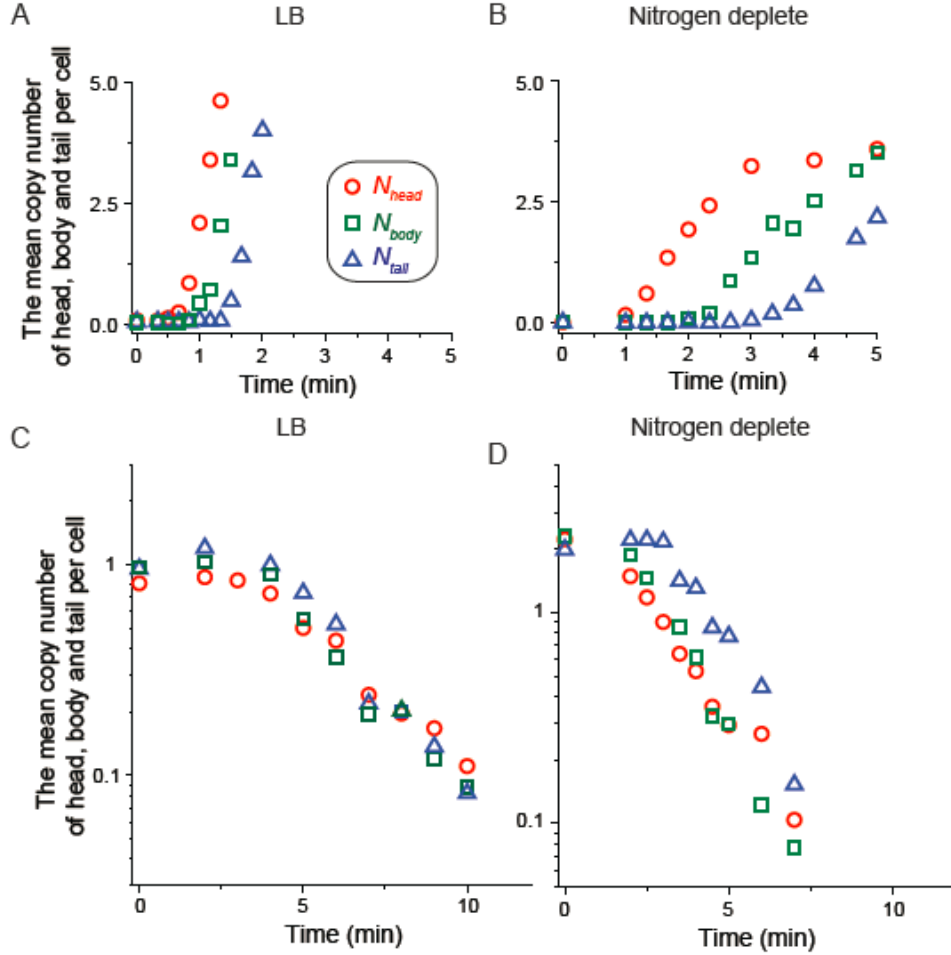

Caption: In the main text, we described that we cultured cells in a minimal medium with glycerol and ammonium as carbon and nitrogen sources, and characterized dynamics of *lacZ* mRNA expression (Figure 3). Here, we cultured cells in a Luria-Bertani (LB) medium and in a minimal medium without ammonium (nitrogen-deplete condition), and repeated the procedure (see the main text and the caption of Figure 3 for details). The increase of  $N_{head}$  (red circles),  $N_{body}$  (green squares), and  $N_{tail}$  (blue triangles) against time after induction by aTc is plotted in the panel A (for cells growing in LB) and in the panel B (for cells under the nitrogen-deplete condition). The decrease of  $N_{head}$ ,  $N_{body}$ , and  $N_{tail}$  after inhibition of the mRNA synthesis by adding rifampicin is plotted in the panel C (for cells growing in LB) and in the panel D (for cells under the nitrogen-deplete condition).

Supplementary Figure S3

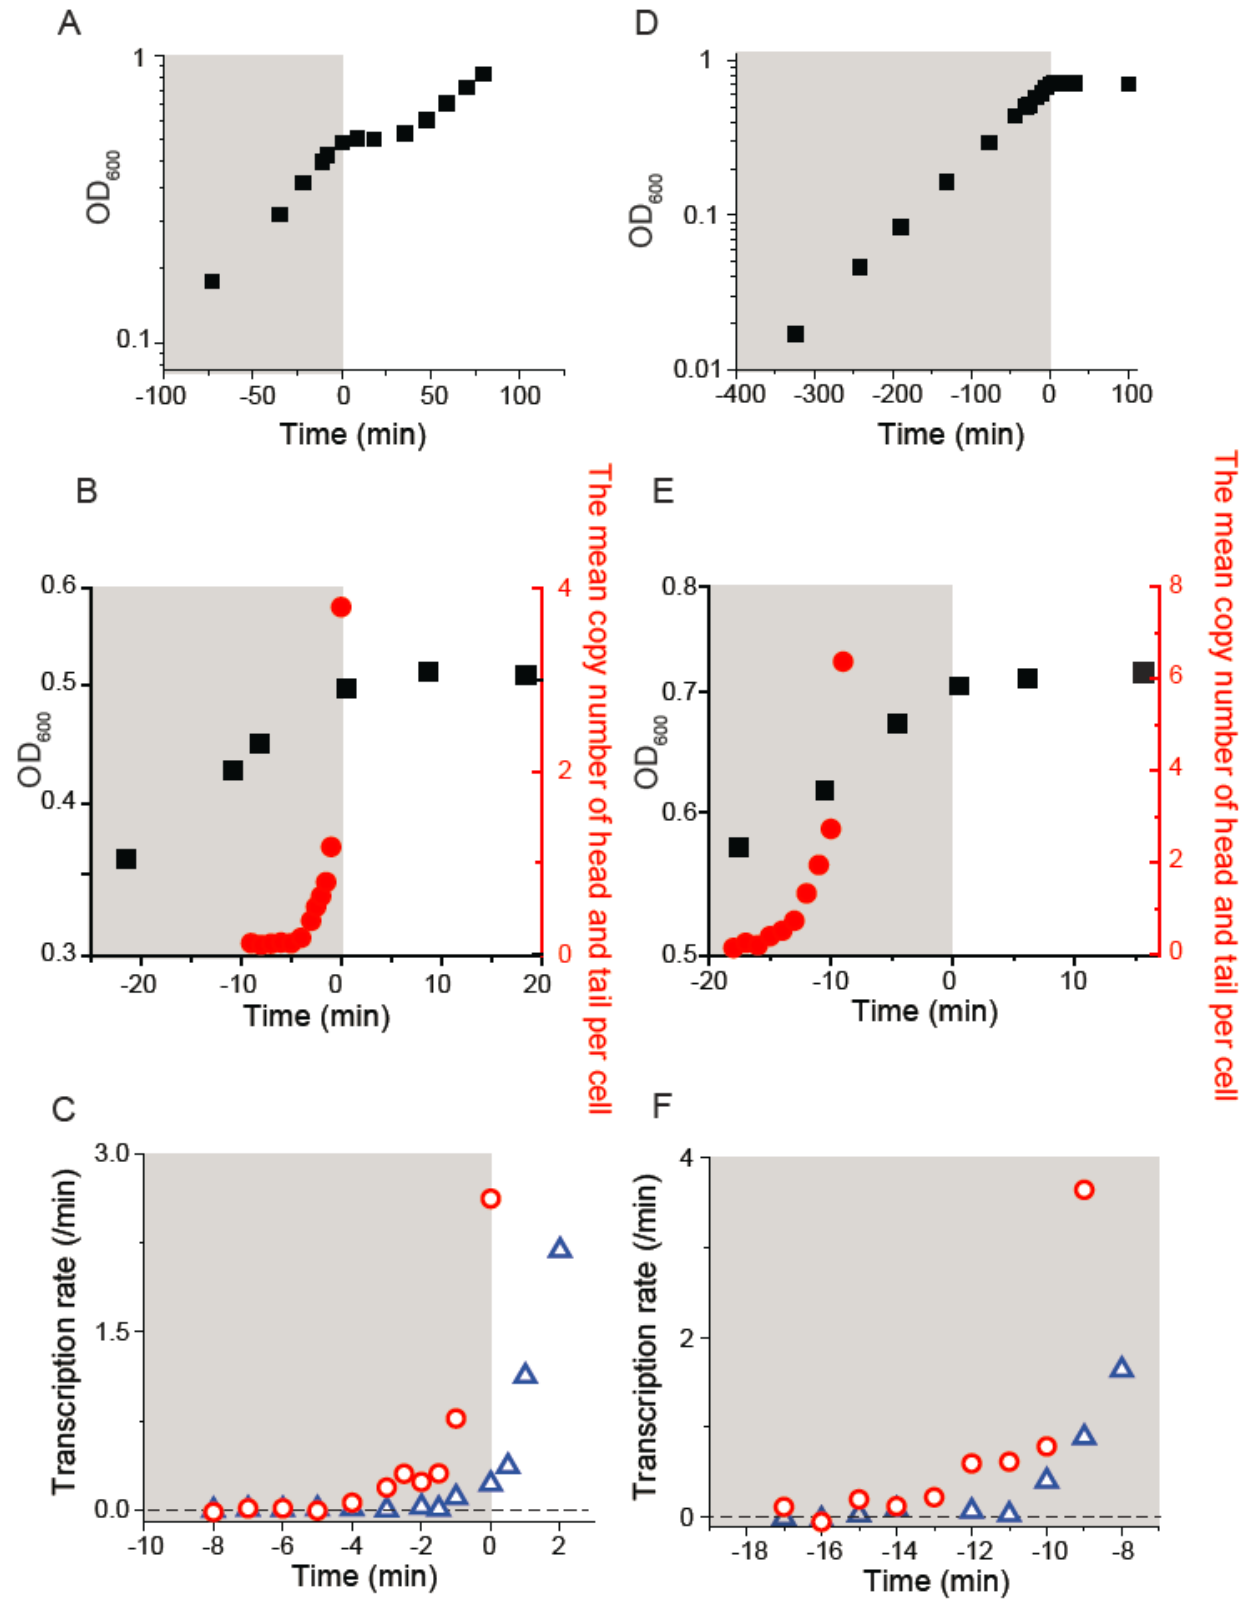

Caption: (A,B,C). Cells were cultured in a minimal medium with glucose and glycerol as carbon sources (ammonium as the sole nitrogen source). The growth curve is plotted in the panel A. Cells initially grew on glucose (shared region) and their growth stopped abruptly; the onset of the growth stop defines the time zero. After some time, cells began to grow on glycerol. We zoomed in on the growth curve near the region where the growth stopped and plotted the copy number of the head of *glpK* mRNA molecules (adopted from Figure 4A) together in the panel B. The direct comparison reveals that the transcription of *glpK* precedes the growth stop. Dividing the difference in the copy number between two consecutive points by the difference in time, we estimated the transcription rate for the head (red circles) and for the tail (blue triangles), and plotted them in the panel C. (D,E,F). Cells were cultured in a minimal medium with a limited amount of ammonium as the nitrogen source (glycerol as carbon source). The growth curve is plotted in the panel D. The onset of the growth stop due to depletion of ammonium defines the time zero. We zoomed in on the growth curve near the region where the growth stopped and plotted the copy number of the head of *amtB* mRNA molecules (adopted from Figure 4B) together in the panel E. The direct comparison reveals that the transcription of *amtB* precedes the growth stop. Dividing the difference in the copy number between two consecutive points by the difference in time, we estimated the transcription rate for the head (red circles) and for the tail (blue triangles), and plotted them in the panel F.

## Supplementary Figure S4

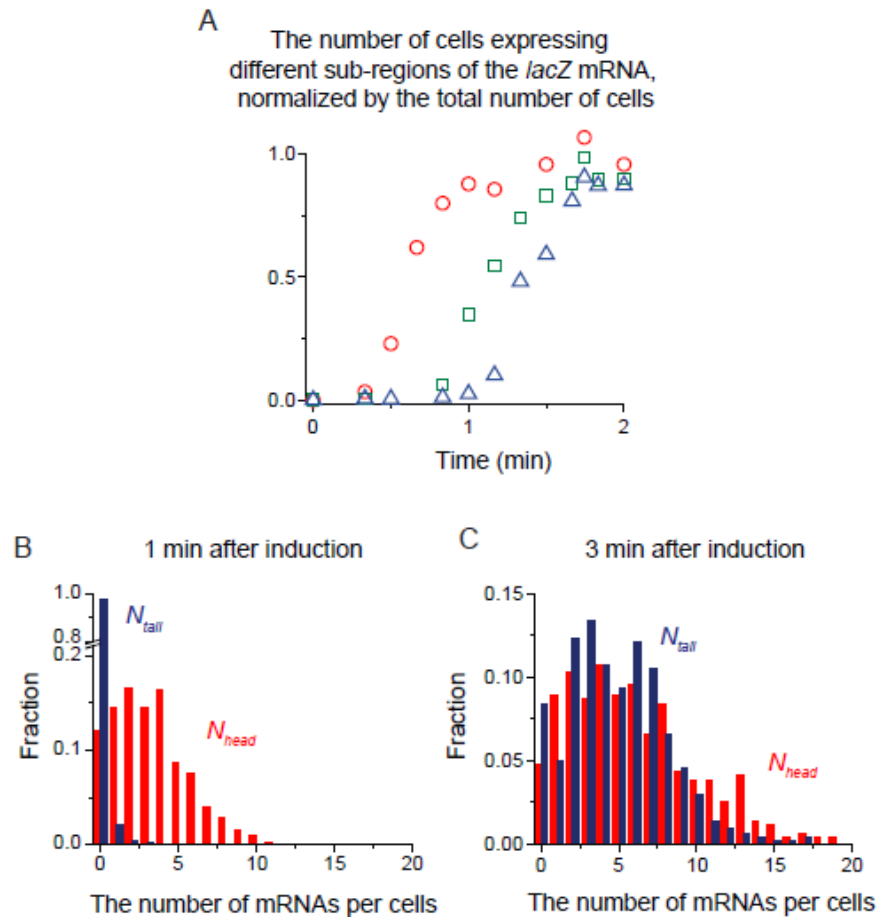

Caption: Upon the induction of the *lacZ* mRNA, expression of mRNA involves significant cell-to-cell variation; see image sequences in Figure 1B. Analyzing the image sequences, we obtained how the number of cells expressing the head of the mRNA (red circle), the body (green square) and the tail (blue triangle) changes over time and normalized them to the total number of cells in the panel A. Then, we plotted the distribution of the number of mRNA copy per cell in 1 min after induction (panel B) and 3 mins after induction (panel C).

## Supplementary Table

### A. Sequences of oligonucleotide probes used for *lacZ* mRNA molecules

| Probes that bind to the head | Probes that bind to the body | Probes that bind to the tail |
|------------------------------|------------------------------|------------------------------|
| GTGAATCCGTAATCATGGTC         | TTCTGCTTCAATCAGCGTGC         | TTTACCTTGTGGAGCGACAT         |
| TCACGACGTTGTAAAACGAC         | ACCATTTTCAATCCGCACCT         | GTAGTTCAGGCAGTTCAATC         |
| TGCAAGGCGATTAAGTTGGG         | TAACGCCTCGAATCAGCAAC         | TTGCACTACGCGTACTGTGA         |
| TATTACGCCAGCTGGCGAAA         | ATGCAGAGGATGATGCTCGT         | AGCGTCACACTGAGGTTTTTC        |
| ATTCAGGCTGCGCAACTGTT         | TCTGCTCATCCATGACCTGA         | ATTCGCTGGTGGTCAGATG          |
| AAACCAGGCAAAGCGCCATT         | TTCATCAGCAGGATATCCTG         | ACCCAGCTCGATGCAAAAAT         |
| AGTATCGGCCTCAGGAAGAT         | CACGGCGTTAAAGTTGTTCT         | CGGTTAAATTGCCAACGCTT         |
| AACCGTGCATCTGCCAGTTT         | AGCGGATGGTTTCGGATAATG        | CTGTGAAAGAAAGCCTGACT         |
| AATGGGATAGGTCACGTTGG         | TTCATCCACCACATACAGGC         | TTGTTTTTTATCGCCAATCC         |
| GAACAAACGGCGGATTGACC         | TGCCGTGGGTTTTCAATATTG        | GTGCACGGGTGAACTGATCG         |
| ATGTGAGCGAGTAACAACCC         | GATCATCGGTCAGACGATTC         | ACTTACGCCAATGTCTGTTAT        |
| TAGCCAGCTTTCATCAACAT         | GATCACACTCGGGTGATTAC         | CACTGCAACAACGCTGCTTC         |
| AATAATTCGCGTCTGGCCTT         | ATACAGCGCGTCGTGATTAG         | CGCATCAGCAAGTGTATCTG         |
| TTGCACCACAGATGAAACGC         | GGATCGACAGATTTGATCCA         | AATAAGGTTTTCCCCTGATG         |
| TTCAGACGGCAAACGACTGT         | CGCGTACATCGGGCAAATAA         | CATCAATCCGGTAGGTTTTTC        |
| CGCGTAAAAATGCGCTCAGG         | AAGCCATTTTTTGATGGACC         | CAACGGTAATCGCCATTGTA         |
| TCCTGATCTTCCAGATAACT         | TATTCGCAAAGGATCAGCGG         | AGTTTTCTTGCGGCCCTAAT         |
| GAGACGTCACGGAAAATGCC         | AAGACTGTTACCCATCGCGT         | GTCAAAACAGGCGGCAGTAA         |
| TGTGTAGTCGGTTTTATGCAG        | TGCCAGTATTTAGCGAAACC         | GGAAGACGTACGGGGTATAC         |
| GGCAACATGGAAATCGCTGA         | CCTGTAAACGGGGATACTGA         | GTGGGCCATAATTCAATTCG         |
| CACATCTGAACTTCAGCCTC         | TAATCAGCGACTGATCCACC         | TGATGTTGAACTGGAAGTCG         |
| CACCTGCCATAAAGAAACT          | GGGTTGCCGTTTTTCATCATA        | TCAGTTGCTGTTGACTGTAG         |
| CTCATCGATAATTCACCGC          | TCGGCGTATCGCCAAAATCA         | AGATGGCGATGGCTGGTTTTC        |
| ACGTTTACAGACGTAGTGTGAC       | TTCATACAGAAGTGGCGATC         | ATTCAGCCATGTGCCTTCTT         |
| GCACGATAGAGATTCGGGAT         | TGGTGTFTTGCTTCCGTCAG         | AATCCCACATATGGAAACCGT        |
|                              | ACGGAAGTGGAAAACTGCT          | GAATTCGCGCGATACTGACG         |
|                              | TATTCGCTGGTCACTTCGAT         | ACACCAGACCAACTGGTAAT         |
|                              | GTTATCGCTATGACGGAACA         |                              |

### B. Sequence of the *lacZ* gene, with the probe-binding sequences underlined

#### Head

ATGACCATGATTACGGATTCACTGGCCGTCGTTTTACAACGTCGTGACTGGGAAAACCCTGG  
 CGTTACCCAACTTAATCGCCTTGCAGCACATCCCCCTTTCGCCAGCTGGCGTAATAGCGAAG  
 AGGCCCGCACCGATCGCCCTTCCCAACAGTTGCGCAGCCTGAATGGCGAATGGCGCTTTGCC  
 TGGTTTTCCGGCACCAAGAGCGGTGCCGAAAGCTGGCTGGAGTGCATCTTCTGAGGCCG  
 AACTGTGTCGTCCCTCAAACTGGCAGATGCACGGTTACGATGCGCCATCTACACCAAC  
 GTGACCTATCCATTACGGTCAATCCGCCGTTTGTTCACGAGAAATCCGACGGGTTGTTA  
 CTCGCTCACATTTAATGTTGATGAAAGCTGGCTACAGGAAGGCCAGACGCGAATTATTTTTG  
 ATGGCGTTAACTCGCGTTTCATCTGTGGTGCAACGGGCGCTGGGTGGTTACGGCCAGGAC  
 AGTCGTTTGGCGTCTGAATTTGACCTGAGCGCATTTTTACGCGCCGGAGAAAACCGCCTCGC

GGTGATGGTGCTGCGCTGGAGTGACGGCAGTTATCTGGAAGATCAGGATATGTGGCGGATG  
AGCGGCATTTCCGTGACGTCTCGTTGCTGCATAAACCGACTACACAAATCAGCGATTTCCA  
TGTTGCCACTCGCTTTAATGATGATTTAGCCGCGCTGTACTGGAGGCTGAAGTTCAGATGT  
GCGGCGAGTTGCGTGACTACCTACGGGTAACAGTTTCTTTATGGCAGGGTGAACGCAGGTC  
GCCAGCGGCACCGCGCCTTTCGGCGGTGAAATTATCGATGAGCGTGGTGGTTATGCCGATCG  
CGTCACTACGTCTGAACGTCGAAAACCCGAAACTGTGGAGCGCCGAAATCCCGAATCTCT  
ATCGTGC

Body

GGTGGTTGAACTGCACACCGCCGACGGCACGCTGATTGAAGCAGAAGCCTGCGATGTGGT  
TTCCGCGAGGTGCGGATTGAAAATGGTCTGCTGCTGCTGAACGGCAAGCCGTTGCTGATTCC  
AGGCGTTAACCGTCACGAGCATCATCCTCTGCATGGTCAGGTCATGGATGAGCAGACGATGG  
TGCAGGATATCCTGCTGATGAAGCAGAACAAC TTAAACGCCGTGCGCTGTTCCGATTATCCG  
AACCATCCGCTGTGGTACACGCTGTGCGACCGCTACGGCCTGTATGTGGTGGATGAAGCCAA  
TATTGAAACCCACGGCATGGTGCCAATGAATCGTCTGACCGATGATCCGCGCTGGCTACCG  
CGATGAGCGAACGCGTAACGCGAATGGTGCAGCGCGATCGTAATCACCCGAGTGTGATCAT  
CTGGTCGCTGGGGAATGAATCAGGCCACGGCGCTAATCACGACGCGCTGTATCGCTGGATCA  
AATCTGTGATCCTTCCCGCCCGGTGCAGTATGAAGGCGGCGGAGCCGACACCACGGCCACC  
GATATTATTTGCCGATGTACGCGCGCTGGATGAAGACCAGCCCTTCCCGGCTGTGCCGAA  
ATGGTCCATCAAAAAATGGCTTTCGCTACCTGGAGAGACGCGCCCGCTGATCCTTTGCGAAT  
ACGCCCACGCGATGGGTAACAGTCTTGGCGGTTTCGCTAAATACTGGCAGGCGTTTCGTCAG  
TATCCCGTTTACAGGGCGGCTTCGTCTGGGACTGGGTGGATCAGTCGCTGATTAATATGA  
TGAAAACGGCAACCCGTTGGTTCGGCTTACGGCGGTGATTTTGGCGATACGCCGAACGATCGCC  
AGTTCTGTATGAACGGTCTGGTCTTTGCCGACCGCACGCCGCATCCAGCGCTGACGGAAGCA  
AAACACCAGCAGCAGTTTTTCCAGTTCGTTTATCCGGGCAAACCATCGAAGTGACCAGCGA  
ATACCTGTTCCGTCATAGCGATAACGAGCTCCTGCACTGGATGGTGGCGCTGGATGGTAAGC  
CGCTGGCAAGCGGTGAAGTGCCTCTGG

Tail

ATGTCGCTCCACAAGGTAAAACAGTTGATTGAACTGCCTGAACTACCGCAGCCGGAGAGCGC  
CGGGCAACTCTGGCTCACAGTACGCGTAGTGCAACCGAACGCGACCGCATGGTCAGAAGCC  
GGGCACATCAGCGCCTGGCAGCAGTGGCGTCTGGCGGAAAACCTCAGTGTGACGCTCCCCG  
CCGCGTCCCACGCCATCCCGCATCTGACCACCAGCGAAATGGATTTTGCATCGAGCTGGGT  
AATAAGCGTTGGCAATTTAACCGCCAGTCAGGCTTCTTTCACAGATGTGGATTGGCGATAA  
AAAACAACCTGCTGACGCCGCTGCGCGATCAGTTCACCCGTGCACCGCTGGATAACGACATTG  
GCGTAAGTGAAGCGACCCGCATTGACCCTAACGCCTGGGTGCAACGCTGGAAGGCGGGCGGG  
CCATTACCAGGCCGAAGCAGCGTTGTTGCAGTGCACGGCAGATACACTTGTGATGCGGTGC  
TGATTACGACCGCTCACGCGTGGCAGCATCAGGGGAAAACCTTATTTATCAGCCGGAAAACC  
TACCGGATTGATGGTAGTGGTCAAATGGCGATTACCGTTGATGTTGAAGTGGCGAGCGATAAC  
ACCGCATCCGGCGCGGATTGGCCTGAACTGCCAGCTGGCGCAGGTAGCAGAGCGGGTAAAC  
TGGCTCGGATTAGGGCCGCAAGAAAACCTATCCCGACCGCCTTACTGCCGCTGTTTTGACCG  
CTGGGATCTGCCATTGTGAGACATGTATAACCCGTACGTCTTCCCGAGCGAAAACGGTCTGC  
GCTGCGGGACGCGCGAATTGAATTATGGCCACACCAGTGGCGCGGGGACTTCCAGTTCAAC  
ATCAGCCGCTACAGTCAACAGCAACTGATGGAAACAGCCATCGCCATCTGCTGCACGCGG

AAGAAGGCACATGGCTGAATATCGACGGTTTCCATATGGGGATTGGTGGCGACGACTCCTG  
GAGCCCGTCAGTATCGGCGGAATTCCAGCTGAGCGCCGGTCGCTACCATTACCAGTTGGTCT  
GGTGTCAAAAATAA

C. Sequences of oligonucleotide probes used for *glpK* mRNA molecules

| Probes that bind to the head | Probes that bind to the tail |
|------------------------------|------------------------------|
| GGTCGAGCGCAACGATATAT         | TTTCACGCACAACCTGACCAA        |
| GCATCGTGATCCATTACGAC         | CATAGGTGTTCTTCGCCATC         |
| GCTGCGACACGCTAATGATA         | TTCATCAGCATAAAGCAGCC         |
| AACCTGGTTTTGGGTAGATT         | TTTTCTGATTTACCGCTTT          |
| CAGATTTCCATTGGGTTCGTG        | CATAGTTCACCTCGCCAGTC         |
| AACTGATATCGGCTTTCGCC         | ATAAACACCGCACCTTCCAA         |
| CCGATAGCTGCAATTTGATC         | AACTTCATTTTCATCGCGCAG        |
| GGTTTCACGCTGGTTCGTAA         | ATATTCGGAATCGTAGGCGT         |
| GTTTCTTTTTCCAGACAAT          | ATTGGTGTTTTGCACTTTGG         |
| TGGCGTTATAGATAGGCTTG         | AAATGCCGGAACCACATACA         |
| CAGATTTCTGCGGTACGACG         | CGAGTCAGACCGAAAATCGC         |
| ACCGTCACGTTTTAAATGCT         | CGCGTATAATGTGGTTAGCG         |
| TGCTGCGGATATAATCTTCT         | TAAGCAATAGACTCCAGCGT         |
| TACGGGTCAATCACCAGACC         | TGCAGACGGATACCAGAGTC         |
| CTTCACTTTGGTGCCAGAAA         | GAAATTGTTTGCTACTGCGC         |
| CTTCCACATGGTCGAGGATC         | TATCGGACTGGAACCTGCATC        |
| CAATCACCACGACGTGCAC          | CGTCGAGGTTCTGCCAGAAG         |
| CACGTATCAACCGTACCAAA         | TCAATCACCGCTTTCTCTTG         |
| CCTGAGTCATTTCCAGATA          | TTTCGATGCCTGGACGGAAC         |
| GTAATCGGTACATGGACAC          | GCGTAACGGTAATTACGCTC         |
| ACATGGTACGAGAGGCGTTG         | GTTTAACCGCTTTTTTCCAG         |
| TCCAGGGTATGGATGTTGAA         |                              |
| ACTTCCAGCATTTTGTCTGTC        |                              |
| AGCATCTCGCGCGGAATATC         |                              |
| GGAAGAACGACGCACTTCTG         |                              |
| TGTTAGTCTGACCGTATACT         |                              |
| CGGAGATTGGAATACGCGTG         |                              |

D. Sequence of the *glpK* gene, with the probe-binding sequences underlined

Head

ATGACTGAAAAAAATATATCGTTGCGCTCGACCAGGGCACCACCAGCTCCCGCGCGGGTCGT  
AATGGATCACGATGCCAATATCATTAGCGTGTCGCAGCGCGAATTTGAGCAAATCTACCCAA  
AACCAGGTTGGGTAGAACACGACCCAATGGAAATCTGGGCCACCCAAAGCTCCACGCTGGT  
AGAAGTGCTGGCGAAAGCCGATATCAGTTCGATCAAATTGCAGCTATCGGTATTACGAACC  
AGCGTGAAACCACTATTGTCTGGGAAAAAGAAACCGGCAAGCCTATCTATAACGCCATTGTC  
TGGCAGTGCCGTCGTACCGCAGAAATCTGCGAGCATTTAAACGTGACGGTTTTAGAAGATTA  
TATCCGCAGCAATACCGGTCTGGTGATTGACCCGTACTTTTCTGGCACCAAAGTGAAGTGGA  
TCCTCGACCATGTGGAAGGCTCTCGCGAGCGTGCACGTCGTGGTGAATTGCTGTTTGGTACG

GTTGATACGTGGCTTATCTGGAAAATGACTCAGGGCCGTGTCCATGTGACCGATTACACCAA  
CGCCTCTCGTACCATGTTGTTCAACATCCATACCCTGGACTGGGACGACAAAATGCTGGAAG  
TGCTGGATATCCGCGGAGATGCTGCCAGAAGTGCCTCGTTCTTCCGAAGTATACGGTCAG  
ACTAACATTGGCGGCAAAGGCGGCACGCGTATCCAATCTCCGGGATCGCCGGTGACCAGC  
AGGCCGCGCTGT

Tail

TTGGTCAGTTGTGCGTGAAAGAAGGGATGGCGAAGAACACCTATGGCACTGGCTGCTTTATG  
CTGATGAACACTGGCGAGAAAGCGGTGAAATCAGAAAACGGCCTGCTGACCACCATCGCCT  
GCGGCCCGACTGGCGAAGTGAACATATGCGTTGGAAGGTGCGGTGTTTATGGCAGGCGCATC  
CATTCAGTGGCTGCGCGATGAAATGAAGTTGATTAACGACGCCTACGATTCCGAATATTTTCG  
CCACCAAAGTGCAAAACACCAATGGTGTGTATGTGGTTCCGGCATTACCGGGCTGGGTGCG  
CCGTACTGGGACCCGTATGCGCGCGGGGCGATTTTCGGTCTGACTCGTGGGGTGAACGCTAA  
CCACATTATACGCGCGACGCTGGAGTCTATTGCTTATCAGACGCGTGACGTGCTGGAAGCGA  
TGCAGGCCGACTCTGGTATCCGTCTGCACGCCCTGCGCGTGGATGGTGGCGCAGTAGCAAAC  
AATTTCTGATGCAGTTCAGTCCGATAATTCTCGGCACCCGCGTTGAGCGCCCGGAAGTGCG  
CGAAGTCACCGCATTGGGTGCGGCCTATCTCGCAGGCCTGGCGGTTGGCTTCTGGCAGAACC  
TCGACGAGCTGCAAGAGAAAGCGGTGATTGAGCGCGAGTCCGTCCAGGCATCGAAACCAC  
TGAGCGTAATTACCGTTACGCAGGCTGGAAAAAAGCGGTTAAACGCGCGATGGCGTGGGAA  
GAACACGACGAATAA

E. Sequences of oligonucleotide probes used for *amtB* mRNA molecules

| Probes that bind to the head | Probes that bind to the tail |
|------------------------------|------------------------------|
| GTTTTTATCGTCGCTATCTT         | CGCGTTTTTCTATCAGATAC         |
| AAGCATCGCCAGTGAAGCAA         | TTTAAACGCCTCTTTACCGA         |
| AACGCATTGTCGGCTTTATC         | TGAAGACCATCGGCAGGTTG         |
| ACCAGCGCAGTACAAATCAT         | ATATAGAGAATGGCAGTCCC         |
| CCCCGGAATAGTCATAAACA         | GGCGTTAAAGCCAAACCAAC         |
| TCAACCCACCGTAAAACAGG         | CCACAGTATTCACAAATGCC         |
| AGCATCGACAGCACGTTTTT         | AAGATCCAGCCAAGAATTGC         |
| CAAATGTCACCGTCACCTGC         | CAGCAGTGAAGGCTTACCAC         |
| ACCCAGAGAATACAGACCAG         | TACCACGCCGATAATCAACG         |
| CGCCAGCGAGTAACCGTAAA         | AGCGTTTGAGCATGGTAACG         |
| GAAGAAGTTGTTGCCCTCAC         | AAGACATCGCAGGGATCATC         |
| GCATCAACCAGTTAATGTTG         | AGCCGACAATGCCACAAACG         |
| GCCGTCAGTTCGATGTTTTT         | GCAAAAATCCCGGTCATGAT         |
| TACTGATAAATGCTGCCAT          | ATCGTCACACCTTCAGCGAA         |
| AGGCAAACGATCCCTGAAAC         | AGCTGTACCAGCAACTGATG         |
| ACTATCAAGCCGACGGTAAT         | GATCGTAATGGCGATGCTTT         |
| TGAGAAGCGGATTCGTTCCG         | TAAATGCCACAACACCGGAC         |
| CCACCACGAAAATCAACACA         | TCAGATCCGCCAATTTGTAG         |
| ATGTAAGAGAGCGTCAGCCA         | TACGCGTTATAGGCATTCTC         |
| CCACACCATATGCGCAATCG         |                              |
| GTGAGAAGCCAGCAAACCAC         |                              |
| ATTGCGGCGTTAATGTGCAC         |                              |



F. Sequence of the *amtB* gene, with the probe-binding sequences underlined

Head

ATGAAGATAGCGACGATAAAAACTGGGCTTGCTTCACTGGCGATGCTTCCGGGACTGGTAAT  
GGCTGCACCTGCGGTGGCCGATAAAGCCGACAATGCGTTTATGATGATTTGTACTGCGCTGG  
TGCTGTTTATGACTATCCGGGGATTGCCCTGTTTTACGGTGGGTTGATTTCGCGGCAAAAACG  
TGCTGTCGATGCTGACGCAGGTGACGGTGACATTTGCACTGGTCTGTATTCTCTGGGTGGTTT  
ACGGTACTCGCTGGCGTTTGGTGAGGGCAACAACCTTCTTCGGCAACATTAACTGGTTGATG  
CTGAAAAACATCGAACTGACGGCGGTGATGGGCAGCATTTATCAGTATATCCACGTGGCGTT  
TCAGGGATCGTTTGCCTGCATTACCGTCGGCTTGATAGTTGGGGCGCTGGCGGAACGAATCC  
GCTTCTCAGCTGTGTTGATTTTCGTGGTGGTATGGCTGACGCTCTCTTACATTCCGATTGCGC  
ATATGGTGTGGGGCGGTGGTTTGCTGGCTTCTCACGGTGCGCTGGATTCGCGGGTGGCACC  
GTGGTGCACATTAACGCCGCAATCGCCGGTCTGGTGGGCGC

Tail

GTATCTGATAGGAAAACGCGTGGGCTTCGGTAAAGAGGGCGTTTAAACCGCACAACTGCCG  
ATGGTCTTCAACGGGACTGCCATTCTCTATATCGGTTGGTTTGGCTTTAACGCCGGGTCAGCG  
GGCACGGCGAATGAAATCGCGGCACTGGCATTGTGAATACTGTGGTTCGCAACGGCGGGCGG  
CAATTCTTGGCTGGATCTTCGGTGAATGGGCGCTGCGTGGTAAGCCTTCACTGCTGGGGGCG  
TGTTCTGGCGGATTGCCGGTCTGGTTCGGCGTGACGCCAGCCTGCGGCTACATTGGGGTTGG  
CGGCGCGTTGATTATCGGCGTGGTAGCTGGTCTGGCGGGCTTGTGGGGCGTTACCATGCTCA  
AACGCTTGCTGCGGGTGGATGATCCCTGCGATGTCTTCGGTGTGCACGGCGTTTGTGGCATT  
GTCGGCTGTATCATGACCGGGATTTTTGCCGCCAGCTCGCTGGGCGGCGTGGGCTTCGCTGA  
AGGTGTGACGATGGGCCATCAGTTGCTGGTACAGCTGGAAGCATCGCCATTACGATCGTCT  
GGTCCGGTGTGTGGCATTATCGGCTACAAATTGGCGGATCTGACGGTGGTCTGCGTGTA  
CCGGAAGAGCAGGAGCGAGAAGGGCTGGATGTCAACAGCCACGGCGAGAATGCCTATAAC  
GCGTAA

**Supplementary Reference**

1. Deris, B.\*, Kim, M.\*, Zhang, Z., Okano, H., Hermsen, R., Groisman, A. and Hwa, T. (2013, \* equal contribution) The innate growth bistability of antibiotic resistant bacteria. *Science*, **342**, 1237435-1237431.
2. Klumpp, S., Zhang, Z. and Hwa, T. (2009) Growth Rate-Dependent Global Effects on Gene Expression in Bacteria. *Cell*, **139**, 1366-1375.
3. Skinner, S.O., Sepúlveda, L.A., Xu, H. and Golding, I. (2013) Measuring mRNA copy number in individual Escherichia coli cells using single-molecule fluorescent in situ hybridization. *Nat. Protocols*, **8**, 1100-1113.
4. Ptashne, M. and Gann, A. (1997) Transcriptional activation by recruitment. *Nature*, **386**, 569-577.
5. Rojo, F. (1999) Repression of Transcription Initiation in Bacteria. *J. Bacteriol.*, **181**, 2987-2991.

6. Yuzenkova, Y., Gamba, P., Herber, M., Attaiech, L., Shafeeq, S., Kuipers, O.P., Klumpp, S., Zenkin, N. and Veening, J.-W. (2014) Control of transcription elongation by GreA determines rate of gene expression in *Streptococcus pneumoniae*. *Nucleic acids research*, **42**, 10987-10999.
